# Supplementary material for: Excited-state intramolecular proton transfer and conformational relaxation in 4′-N,N-dimethylamino-3-hydroxyflavone doped in acetonitrile crystals
Source: Royal Society of Chemistry journal article supplement (doi:10.1039/c6cp04322d), 2016-01-01
Supplement: c6cp04322d1.pdf [file c6cp04322d1.pdf]

Supporting Information

**Excited-state intramolecular proton transfer and conformational relaxation in 4'-N,N-dimethylamino-3-hydroxyflavone doped in acetonitrile crystals**

Kazuki Furukawa,<sup>a,‡</sup> Norifumi Yamamoto,<sup>b</sup> Kazuyuki Hino<sup>c</sup> and Hiroshi Sekiya<sup>a,\*</sup>

<sup>a</sup>*Department of Chemistry, Faculty of Science, Kyushu University, 744 Motoooka, Nishiku, Fukuoka 813-0395, Japan*

<sup>b</sup>*Department of Life and Environmental Sciences, Faculty of Engineering, Chiba Institute of Technology, Tsudanuma 2-17-1, Narashino, Chiba 275-0016, Japan*

<sup>c</sup>*Department of Chemistry, Faculty of Education, Aichi University of Education, 1 Hirosawa, Igaya, Kariya, Aichi 448-8542, Japan*

<sup>‡</sup> *Present address: Department of Physics, College of Humanities and Sciences, Nihon University, 3-25-40 Sakurajosui, Setagaya-ku, Tokyo 156-8550, Japan*

Corresponding author: Hiroshi Sekiya, E-mail: [sekiya@chem.kyushu-univ.jp](mailto:sekiya@chem.kyushu-univ.jp)

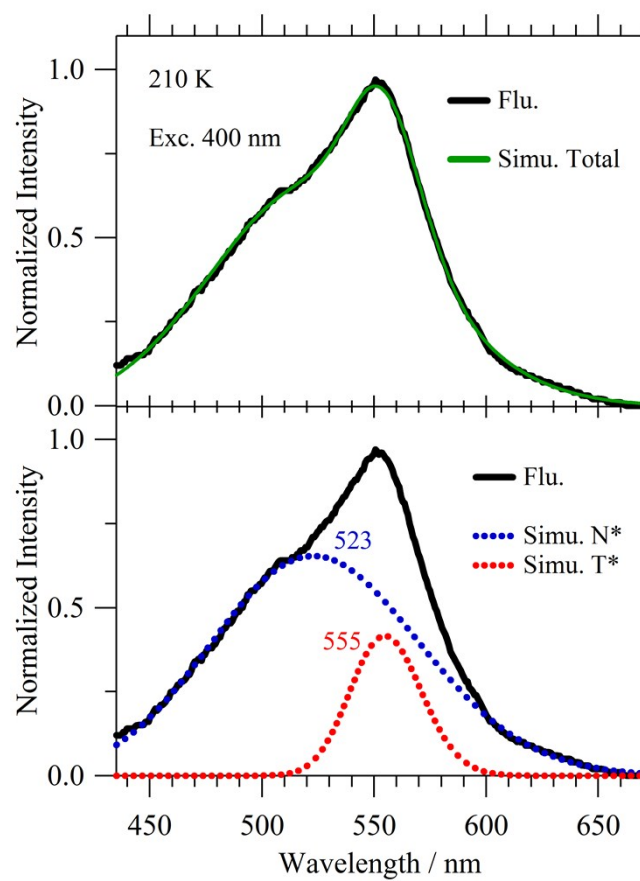

**Fig. S1** Uncorrected fluorescence spectrum at 210 K (green solid line in upper panel) and simulated spectrum (green solid line in upper panel) obtained by fitting with two log-normal functions for the N\* (blue dotted line) and T\* (red dotted line) emission bands. Exc. is excitation, Flu. is fluorescence and Simu. is simulated.

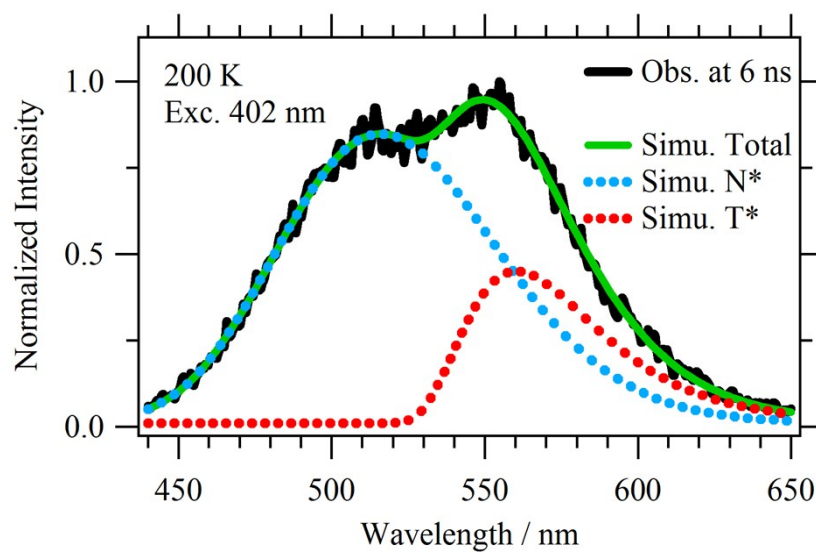

**Fig. S2** Uncorrected fluorescence spectrum measured at 200 K (black solid line) and simulated spectrum (green solid line) obtained by fitting with two log-normal functions for the N\* (blue dotted line) and T\* (red dotted line) emission bands. Exc. is excitation, Obs. is observed, and Simu. is simulated.

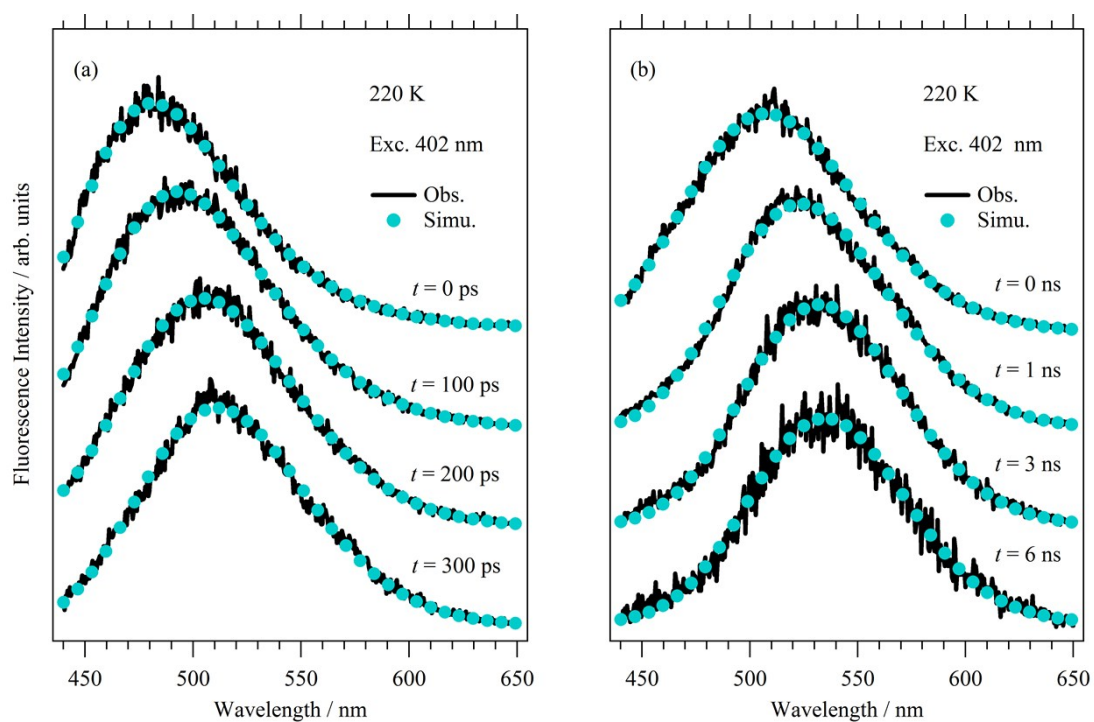

**Fig. S3** Uncorrected fluorescence spectra measured at 220 K (black solid line) measured by exciting at 402 nm in the range of 0-300 ps (Fig. S3a) and those in the range of 0-6 ns (Fig. S3b). Simulated spectra (blue dotted lines) were obtained by fitting with a log-normal function for the N\* and T\* emission bands. Obs. and Simu. indicate observed and simulated, respectively.
